# Supplementary material
Source: PubMed Central journal article supplement (PMC4515043)
Supplement: supp_WNL.0000000000001738_Supplemental_data.pdf [file supp_WNL.0000000000001738_Supplemental_data.pdf]

## **Alzheimer's disease biomarker characteristics in cognitively normal longitudinally followed subjects with memory, executive and multi-domain subtle cognitive impairment**

Jon B. Toledo<sup>a</sup>, MD, Maria Bjerke<sup>a</sup>, PhD, Kewei Chen<sup>b</sup>, PhD, Martin Rozycki<sup>c</sup>, MS, Clifford R Jack Jr<sup>d</sup>, MD, Michael W. Weiner<sup>e</sup>, MD, Steven E. Arnold<sup>f</sup>, MD, Eric M. Reiman<sup>c</sup>, MD, Christos Davatzikos<sup>b</sup>, Leslie M. Shaw<sup>a</sup>, PhD, and John Q. Trojanowski<sup>a\*</sup>, MD, PhD for the Alzheimer's Disease Neuroimaging Initiative\*\*

<sup>a</sup>Department of Pathology & Laboratory Medicine, Institute on Aging, Center for Neurodegenerative Disease Research, University of Pennsylvania Perelman School of Medicine, Philadelphia, PA; <sup>b</sup>Banner Alzheimer's Institute, 901 East Willetta Street, Phoenix, AZ; <sup>c</sup>Center for Biomedical Image Computing and Analytics, Philadelphia, PA <sup>d</sup>Mayo Clinic College of Medicine, Rochester, MN; <sup>e</sup>Center for Imaging of Neurodegenerative Diseases, Department of Radiology, San Francisco VA Medical Center/University of California San Francisco, San Francisco, CA; <sup>f</sup>Department of Psychiatry, Perelman School of Medicine at the University of Pennsylvania, Philadelphia, PA.

### **e-methods**

#### ADNI cohort

The primary goal of ADNI has been to test whether serial MRI, PET, other biological markers, and clinical and neuropsychological assessment can be combined to measure the progression of MCI and early AD. Determination of sensitive and specific markers of very early AD progression is intended to aid researchers and clinicians to develop new treatments and monitor their effectiveness, as well as lessen the time and cost of clinical trials.

The Principal Investigator of this initiative is Michael W. Weiner, MD, VA Medical Center and University of California –San Francisco. ADNI is the result of efforts of many co-investigators from a broad range of academic institutions and private corporations, and subjects have been recruited from over 50 sites across the U.S. and Canada. The initial goal of ADNI was to recruit 800 subjects but ADNI has been followed by ADNI-GO and ADNI-2. To date these three protocols have recruited over 1500 adults, ages 55 to 90, to participate in the research, consisting of cognitively normal older individuals, people with early or late MCI, and people with early AD. The follow up duration of each group is specified in the protocols for ADNI-1, ADNI-2 and ADNI-GO. Subjects originally recruited for ADNI-1 and ADNI-GO had the option to be followed in ADNI-2. For up-to-date information, see [www.adni-info.org](http://www.adni-info.org).

Inclusion criteria were as follows: 1) Hachinski Ischemic Score  $\leq 4$ ; 2) Permitted medications stable for 4 weeks prior to screening; 3) Geriatric Depression Scale score  $< 6$ ; 4) visual and auditory acuity adequate for neuropsychological testing; good general health with no diseases precluding enrollment; 5) 6 grades of education or work history equivalent; 6) Ability to speak English or Spanish fluently; 7) A study partner with 10 hours

per week of contact either in person or on the telephone and who could accompany the participant to the clinical visits. HC had to score 24-30 in mini-mental state examination, 0 in the clinical dementia rating and be above years of education (YoEd) adjusted delayed memory recall cut-offs (16 YoEd:  $\geq 9$ , 8-15 YoEd:  $\geq 5$  and 0-7 YoEd:  $\geq 3$ ).

#### CSF collection and A $\beta$ <sub>1-42</sub> measurement

CSF was collected into polypropylene collection tubes or syringes provided to each site, transferred into polypropylene transfer tubes without any centrifugation step followed by freezing on dry ice within 1 hr after collection, and overnight shipment to the ADNI Biomarker Core laboratory at the University of Pennsylvania Medical Center on dry ice. The samples were thawed for 1 hour at room temperature, gently mixed and divided into aliquots (0.5 ml). The aliquots were stored in bar code-labeled polypropylene vials at -80°C. The analyte-specific detection antibodies were HT7, for tau, and 3D6, for the N-terminus of A $\beta$ <sup>1</sup>.

**Table e-1.** Criteria for classifying ADNI subjects into the different CN, preclinical AD stages described in this study.

|         | Abnormal A $\beta$ | Abnormal Neuronal Injury | Abnormal Cognitive Changes |
|---------|--------------------|--------------------------|----------------------------|
| Stage 0 | -                  | -                        | -                          |
| Stage 1 | +                  | -                        | -                          |
| Stage 2 | +                  | +                        | -                          |
| Stage 3 | +                  | +                        | +                          |
| SNAP    | -                  | +                        | $\pm$                      |
| SCINIB  | $\pm$              | -                        | +                          |

SCINIB: Subjective cognitive impairment with normal neuronal injury biomarkers; SNAP: Suspected non-amyloid pathology.

+: Abnormal; -: Normal;  $\pm$ : Normal or abnormal.

**Table e-2.** Characteristics of the subjects included in the study, including the language SCI category.

|                             | CN               | SMC              | Executive SCI           | Memory SCI       | Multi-domain SCI        | Language SCI     | p-value                    |
|-----------------------------|------------------|------------------|-------------------------|------------------|-------------------------|------------------|----------------------------|
| 5 <sup>th</sup> Percentile  | (n=294)          | (n=71)           | (n=40)                  | (n=64)           | (n=40)                  | (n=13)           |                            |
| Age (years)*                | 73.9 (5.5)       | 71.6 (5.2)       | 77.0 (5.2)              | 74.9 (6.4)       | 78.0 (5.8)              | 73.7 (5.7)       | <0.0001 <sup>a,b,d</sup>   |
| Gender (% male)             | 45.9%            | 35.2%            | 47.5%                   | 73.4%            | 60.0%                   | 23.1%            | 0.0001 <sup>c,d</sup>      |
| APOE ε4 (%)                 | 26.6%            | 33.8%            | 27.5%                   | 30.0%            | 27.5%                   | 38.5%            | 0.79                       |
| SMC                         | -                | -                | 28.3%                   | 21.1%            | 22.2%                   |                  | 1.0                        |
| ADAS-Cog†                   | 8.0 (5.1-10.0)   | 7.0 (5.0-9.0)    | 10.3 (8.0-13.0)         | 13.0 (11.0-15.0) | 14.7 (10.9-16.5)        | 7.3 (6.3-11.0)   | <0.0001 <sup>b,c,d</sup>   |
| MMSE†                       | 29.0 (29.0-30.0) | 29.0 (29.0-30.0) | 29.0 (29.0-30.0)        | 29.0 (28.0-30.0) | 28.0 (27.0-29.3)        | 29.0 (28.0-30.0) | 0.0001 <sup>c,d,e</sup>    |
| Memory†                     | 1.06 (0.78-1.39) | 1.07 (0.84-1.37) | 0.84 (0.63-1.04)        | 0.30 (0.15-0.44) | 0.32 (0.07-0.51)        | 0.74 (0.64-0.93) | <0.0001 <sup>b,c,d,e</sup> |
| Executive†                  | 0.92 (0.54-1.44) | 0.92 (0.48-1.33) | -0.20 [(-0.36)-(-0.09)] | 0.63 (0.28-0.94) | -0.29 [(-0.59)-(-0.14)] | 0.92 (0.48-1.33) | <0.0001 <sup>b,c,d</sup>   |
| 10 <sup>th</sup> Percentile | (n=260)          | (n=63)           | (n=50)                  | (n=59)           | (n=75)                  | (n=15)           |                            |
| Age (years)*                | 73.6 (5.4)       | 71.5 (5.2)       | 76.5 (5.0)              | 74.3 (5.8)       | 77.5 (6.1)              | 72.7 (6.8)       | <0.0001 <sup>a,b,d</sup>   |
| Gender (% male)             | 44.2%            | 34.9%            | 44.0%                   | 76.3%            | 60.0%                   | 26.7%            | <0.0001 <sup>c,d</sup>     |
| APOE ε4 (%)                 | 27.8%            | 31.7%            | 30.0%                   | 25.5%            | 29.3%                   | 26.7%            | 0.98                       |
| SMC                         | -                | -                | 26.0%                   | 27.1%            | 16.0%                   | 13.3%            | 0.32                       |
| ADAS-Cog†                   | 7.2 (5.0-10.0)   | 6.0 (5.0-9.0)    | 9.3 (7.0-11.6)          | 12.3 (11.0-14.2) | 14.0 (10.7-16.0)        | 7.3 (6.7-9.3)    | <0.0001 <sup>b,c,d</sup>   |
| MMSE†                       | 29.0 (29.0-30.0) | 29.0 (29.0-30.0) | 29.0 (29.0-30.0)        | 29.0 (29.0-30.0) | 29.0 (27.5-29.0)        | 29.0 (28.0-30.0) | <0.0001 <sup>d,e</sup>     |
| Memory†                     | 1.10 (0.82-1.42) | 1.14 (0.86-1.43) | 0.92 (0.76-1.13)        | 0.37 (0.21-0.48) | 0.44 (0.20-0.55)        | 0.80 (0.68-0.94) | <0.0001 <sup>b,c,d,e</sup> |
| Executive†                  | 1.00 (0.58-1.51) | 0.95 (0.58-1.41) | -0.09 [(-0.23)-(0.08)]  | 0.74 (0.58-1.17) | -0.08 [(-0.48)-(0.08)]  | 0.37 (0.30-0.65) | <0.0001 <sup>b,c,d,e</sup> |

ADAS-Cog : Alzheimer's Disease Assessment Scale - Cognitive Subscale; CN: Cognitively normal; MMSE: Mini Mental State Examination; SCI: Subtle cognitive impairment; SMC: Subjective memory complaints;

\*Mean (standard deviation); †Median (1<sup>st</sup> quartile-3<sup>rd</sup> quartile). <sup>a</sup>CN and SMC comparison p<0.05; <sup>b</sup>CN and executive SCI comparison p<0.05; <sup>c</sup>CN and memory SCI comparison p<0.05; <sup>d</sup>CN and multi-domain SCI comparison p<0.05; <sup>e</sup>CN and language SCI comparison p<0.05. p-values in the last columns were based on ANOVA except gender and *APOE* which were based on fisher exact test.

**Table e-3.** Amyloid burden and neurodegeneration biomarkers in CN, SMC and the different SCI categories, including language SCI.

|                                   | CN                      | SMC                     | Ex. SCI                 | Mem. SCI               | MD SCI                  | Lang. SCI                | p-value CN vs. |         |         |        |           |
|-----------------------------------|-------------------------|-------------------------|-------------------------|------------------------|-------------------------|--------------------------|----------------|---------|---------|--------|-----------|
|                                   |                         |                         |                         |                        |                         |                          | SMC            | Ex. SCI | Mem.SCI | MD SCI | Lang. SCI |
| <b>5<sup>th</sup> Percentile</b>  |                         |                         |                         |                        |                         |                          |                |         |         |        |           |
| CSF A $\beta$ <sub>1-42</sub>     | 211.8<br>(169.4-241.6)  | 213.0<br>(160.0-242.7)  | 207.9<br>(159.0-243.5)  | 196.4<br>(148.0-233.5) | 171.2<br>(137.5-213.1)  | 231.5<br>(172.4-257.9)   | 0.77           | 0.92    | 0.059   | 0.009  | 0.38      |
| CSF T-Tau                         | 56.4<br>(45.0-81.3)     | 59.7<br>(45.0-80.2)     | 68.5<br>(48.7-92.4)     | 67.0<br>(49.9-89.3)    | 58.4 (40.8-81.3)        | 55.1 (48.0-72.9)         | 0.85           | 0.67    | 0.42    | 0.076  | 0.72      |
| CSF P-Tau <sub>181</sub>          | 24.4<br>(18.8-39.4)     | 30.9<br>(23.6-46.7)     | 29.3<br>(23.5-43.1)     | 30.6<br>(20.4-38.7)    | 27.4 (17.3-34.6)        | 16.8 (15.1-29.3)         | 0.0008         | 0.15    | 0.28    | 0.57   | 0.079     |
| MRI-aHV                           | 743.2<br>(159.5-1271.1) | 783.5<br>(439.6-1374.5) | 645.1<br>(124.4-1157.0) | 755.1<br>(30.5-1374.4) | 567.7 [(-116.5)-1003.2] | 1057.3 [(-601.3)-1373.4] | 0.42           | 0.89    | 0.82    | 0.91   | 0.78      |
| MRI-SPARE-AD                      | -1.4 [(-1.8)-(-1.1)]    | -1.1 [(-1.6)-(-0.7)]    | -1.2 [(-1.5)-(-0.7)]    | -1.2 [(-1.6)-(-0.9)]   | -0.9 [(-1.4)-(-0.5)]    | -1.6 [(-1.8)-(-0.8)]     | 0.002          | 0.23    | 0.013   | 0.003  | 0.49      |
| WMH                               | 0.20<br>(0.08-0.58)     | -                       | 0.36<br>(0.12-0.70)     | 0.22<br>(0.09-0.37)    | 0.34 (0.25-0.73)        | 0.20 (0.07-0.27)         | -              | 0.50    | 0.96    | 0.14   | 0.50      |
| Posterior cingulate PET           | 2.1 (2.0-2.2)           | -                       | 2.0 (1.9-2.1)           | 2.1 (1.9-2.2)          | 2.0 (1.9-2.0)           | 2.0 (2.0-2.1)            | -              | 0.026   | 0.40    | 0.049  | 0.42      |
| PET-HCI                           | 8.5 (6.8-10.6)          | 5.6 (5.2-6.9)           | 8.9 (7.2-11.4)          | 8.1 (7.0-11.2)         | 10.2 (7.8-16.3)         | 8.8 (5.7-12.2)           | 0.084          | 0.69    | 0.69    | 0.075  | 0.70      |
| <b>10<sup>th</sup> Percentile</b> |                         |                         |                         |                        |                         |                          |                |         |         |        |           |
| CSF A $\beta$ <sub>1-42</sub>     | 211.8<br>(166.6-243.5)  | 213.0<br>(160.0-243.5)  | 203.0<br>(156.2-245.7)  | 196.4<br>(147.5-235.5) | 171.2<br>(137.5-194.5)  | 171.2<br>(137.5-194.5)   | 0.75           | 0.10    | 0.11    | 0.005  |           |

|                               |                              |                              |                              |                              |                                  |                                  |        |       |       |       |
|-------------------------------|------------------------------|------------------------------|------------------------------|------------------------------|----------------------------------|----------------------------------|--------|-------|-------|-------|
| CSF T-Tau                     | 56.4<br>(44.6-<br>78.0)      | 57.0<br>(43.5-<br>80.4)      | 63.6<br>(49.8-<br>86.4)      | 63.6<br>(45.9-<br>79.2)      | 63.5 (42.8-<br>98.8)             | 63.5 (42.8-<br>98.8)             | 0.95   | 0.72  | 0.63  | 0.40  |
| CSF P-<br>Tau <sub>181</sub>  | 24.1<br>(18.3-<br>37.9)      | 30.3<br>(23.6-<br>47.5)      | 28.5<br>(22.0-<br>43.4)      | 31.4<br>(19.7-<br>42.7)      | 28.3 (19.6-<br>36.3)             | 28.3 (19.6-<br>36.3)             | 0.0008 | 0.054 | 0.08  | 0.76  |
| MRI-aHV                       | 778.5<br>(179.5-<br>1297.1)  | 763.4<br>(408.3-<br>1359.3)  | 675.2<br>(151.2-<br>1196.7)  | 908.0<br>(306.7-<br>1379.7)  | 148.7 [(-<br>222.0)-<br>(860.8)] | 148.7 [(-<br>222.0)-<br>(860.8)] | 0.60   | 0.59  | 0.84  | 0.11  |
| MRI-<br>SPARE-AD              | -1.4 [(-<br>1.8)-(-<br>1.1)] | -1.1 [(-<br>1.6)-(-<br>0.7)] | -1.1 [(-<br>1.5)-(-<br>0.6)] | -1.3 [(-<br>1.6)-(-<br>1.0)] | -1.1 [(-1.7)-<br>(-0.5)]         | -1.1 [(-1.7)-<br>(-0.5)]         | 0.001  | 0.038 | 0.059 | 0.039 |
| WMH                           | 0.22<br>(0.08-<br>0.58)      | -                            | 0.27<br>(0.11-<br>0.57)      | 0.23<br>(0.08-<br>0.39)      | 0.28 (0.18-<br>0.62)             | 0.28 (0.18-<br>0.62)             | -      | 0.98  | 0.84  | 0.55  |
| Posterior<br>cingulate<br>PET | 2.1 (2.0-<br>2.2)            | -                            | 2.1 (2.0-<br>2.1)            | 2.1 (1.9-<br>2.2)            | 2.0 (1.9-2.0)                    | 2.0 (1.9-2.0)                    | -      | 0.24  | 0.70  | 0.019 |
| PET-HCI                       | 8.6 (6.7-<br>10.7)           | 5.5 (5.2-<br>6.3)            | 8.6 (7.3-<br>10.2)           | 8.2 (6.9-<br>12.1)           | 10.3 (7.0-<br>14.6)              | 10.3 (7.0-<br>14.6)              | 0.03   | 0.99  | 0.80  | 0.06  |

aHV: Adjusted hippocampal volume; CN: Cognitively normal; CSF: Cerebrospinal fluid; Ex.: Executive; Lang.: Language; MD: Multi-domain; Mem.: Memory; PET-HCI: PET hypometabolic convergence index; SCI: Subtle cognitive impairment; SMC: Subjective memory complaints; MRI-SPARE-AD: MRI Spatial Pattern of Abnormalities for Recognition of Early Alzheimer's disease; WMH: White matter hyperintensities.

Linear regression models are adjusted for age and gender.

**Table e-4.** Amyloid burden and neuronal injury biomarkers in CN, SMC and the different SCI categories using only subjects who had the different biomarker measurements available.

|                               | CN                   | Ex. SCI              | Mem. SCI             | MD SCI                   | p-value CN vs. |         |        |
|-------------------------------|----------------------|----------------------|----------------------|--------------------------|----------------|---------|--------|
|                               |                      |                      |                      |                          | Ex. SCI        | Mem.SCI | MD SCI |
| 5 <sup>th</sup> Percentile    | (n=145)              | (n=16)               | (n=29)               | (n=16)                   |                |         |        |
| CSF A $\beta$ <sub>1-42</sub> | 213.0 (168.0-240.9)  | 210.0 (162.6-245.7)  | 198.0 (147.0-229.1)  | 165.7 (137.5-195.0)      | 0.94           | 0.13    | 0.01   |
| CSF T-Tau                     | 54.8 (44.6-77.8)     | 61.9 (49.4-88.5)     | 70.3 (50.0-90.1)     | 60.2 (41.4-90.8)         | 0.93           | 0.28    | 0.29   |
| CSF P-Tau <sub>181</sub>      | 25.8 (19.5-41.8)     | 26.6 (19.8-34.8)     | 32.3 (21.5-37.1)     | 28.3 (20.1-33.4)         | 0.98           | 0.75    | 0.31   |
| MRI-aHV                       | 607.5 (132.2-1210.3) | 728.8 (438.3-1056.0) | 909.1 (60.5-1419.3)  | 139.5 [(-178.0)-(928.7)] | 0.20           | 0.37    | 0.56   |
| MRI-SPARE-AD                  | -1.4 [(-1.7)-(-1.2)] | -1.2 [(-1.5)-(-0.6)] | -1.1 [(-1.6)-(-0.7)] | -0.9 [(-1.4)-(-0.6)]     | 0.082          | 0.0081  | 0.011  |
| PET-HCI                       | 8.4 (6.7-10.5)       | 7.9 (6.6-9.3)        | 7.8 (6.5-10.6)       | 10.6 (7.8-14.7)          | 0.88           | 0.81    | 0.064  |
| 10 <sup>th</sup> Percentile   | (n=127)              | (n=25)               | (n=29)               | (n=27)                   |                |         |        |
| CSF A $\beta$ <sub>1-42</sub> | 211.8 (166.6-243.5)  | 203.0 (156.2-245.7)  | 196.4 (147.5-235.5)  | 171.2 (137.5-194.5)      | 0.10           | 0.11    | 0.005  |
| CSF T-Tau                     | 56.4 (44.6-78.0)     | 63.6 (49.8-86.4)     | 63.6 (45.9-79.2)     | 63.5 (42.8-98.8)         | 0.72           | 0.63    | 0.40   |
| CSF P-Tau <sub>181</sub>      | 24.1 (18.3-37.9)     | 28.5 (22.0-43.4)     | 31.4 (19.7-42.7)     | 28.3 (19.6-36.3)         | 0.054          | 0.08    | 0.76   |
| MRI-aHV                       | 778.5 (179.5-1297.1) | 675.2 (151.2-1196.7) | 908.0 (306.7-1379.7) | 148.7 [(-222.0)-(860.8)] | 0.59           | 0.84    | 0.11   |
| MRI-SPARE-AD                  | -1.4 [(-1.8)-(-1.1)] | -1.1 [(-1.5)-(-0.6)] | -1.3 [(-1.6)-(-1.0)] | -1.1 [(-1.7)-(-0.5)]     | 0.038          | 0.059   | 0.039  |
| PET-HCI                       | 8.4 (6.7-10.6)       | 8.5 (7.2-9.6)        | 7.8 (6.1-10.9)       | 9.5 (7.0-13.5)           | 0.96           | 0.84    | 0.24   |

aHV: Adjusted hippocampal volume; CN: Cognitively normal; CSF: Cerebrospinal fluid; Ex.: Executive; Lang.: Language; MD: Multi-domain; Mem.: Memory; PET-HCI: PET hypometabolic convergence index; SCI: Subtle cognitive impairment; SMC: Subjective memory complaints; MRI-SPARE-AD: MRI Spatial Pattern of Abnormalities for Recognition of Early Alzheimer's disease; WMH: White matter hyperintensities.

Linear regression models are adjusted for age and gender.



**Table e-5.** Classification into preclinical dementia stages including language SCI.

| Preclinical AD Stage        | CN         | SMC        | Executive SCI | Memory SCI | Language SCI | Multi-domain SCI |
|-----------------------------|------------|------------|---------------|------------|--------------|------------------|
| 5 <sup>th</sup> Percentile  |            |            |               |            |              |                  |
| Stage 0                     | 69 (37.5%) | 12 (35.3%) | -             | -          | -            | -                |
| Stage 1                     | 27 (14.7%) | 7 (20.6%)  | -             | -          | -            | -                |
| Stage 2                     | 40 (21.7%) | 9 (26.5%)  | -             | -          | -            | -                |
| Stage 3                     | -          | -          | 9 (42.9%)     | 12 (37.5%) | 1 (14.3%)    | 10 (55.6%)       |
| SNAP                        | 48 (26.1%) | 6 (17.6%)  | 6 (28.6%)     | 7 (21.9%)  | 2 (28.6%)    | 3 (16.7%)        |
| SCINIB                      | -          | -          | 6 (28.6%)     | 13 (40.6%) | 4 (57.1%)    | 5 (27.8%)        |
| Total                       | 184 (100%) | 34 (100%)  | 21 (100%)     | 32 (100%)  | 7 (100%)     | 18 (100%)        |
| 10 <sup>th</sup> Percentile |            |            |               |            |              |                  |
| Stage 0                     | 63 (39.1%) | 11 (36.7%) | -             | -          | -            | -                |
| Stage 1                     | 24 (14.9%) | 4 (13.3%)  | -             | -          | -            | -                |
| Stage 2                     | 33 (20.5%) | 9 (30.0%)  | -             | -          | -            | -                |
| Stage 3                     | -          | -          | 11 (44.0%)    | 11 (37.9%) | 1 (14.3%)    | 16 (42.1%)       |
| SNAP                        | 41 (25.5%) | 6 (20.0%)  | 8 (32.0%)     | 4 (13.8%)  | 2 (28.6%)    | 11 (28.9%)       |
| SCINIB                      | -          | -          | 6 (24.0%)     | 14 (48.3%) | 4 (57.1%)    | 1 (28.9%)        |
| Total                       | 161 (100%) | 30 (100%)  | 25 (100%)     | 29 (100%)  | 7 (100%)     | 38 (100%)        |

AD: Alzheimer's disease; CN: Cognitively normal; SCI: Subtle cognitive impairment; SCINIB: Subjective cognitive impairment with normal neuronal injury biomarkers; SMC: Subjective memory complaints; SNAP: Suspected non-amyloid pathology.

**Figure e-1.** Subjects with a CN diagnosis in each visits and number of conversion from CN to MCI or CN to AD in each follow-up visit.

|     | <u>Remain CN</u>              | <u>MCI conversion</u> | <u>AD conversion</u> |
|-----|-------------------------------|-----------------------|----------------------|
| BI  | ADNI 1: 229<br>ADNI GO/2: 293 |                       |                      |
| 6m  | ADNI 1: 222<br>ADNI GO/2: 275 | 2                     |                      |
| 12m | ADNI 1: 215<br>ADNI GO/2: 200 | 4                     |                      |
| 24m | ADNI 1: 209<br>ADNI GO/2: 146 | 9                     |                      |
| 36m | ADNI 1: 186<br>ADNI GO/2: 5   | 7                     | 1                    |
| 48m | ADNI 1: 137<br>ADNI GO/2: 2   | 5                     |                      |
| 60m | ADNI 1: 122                   | 3                     |                      |
| 72m | ADNI 1: 112                   | 6                     |                      |
| 84m | ADNI 1: 89                    | 12                    | 1                    |
| 96m | ADNI 1: 45                    | 9                     | 1                    |

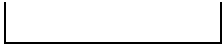

## References

1. Shaw LM, Vanderstichele H, Knapik-Czajka M, et al. Qualification of the analytical and clinical performance of CSF biomarker analyses in ADNI. *Acta neuropathologica* 2011;121:597-609.
